# Supplementary material for: Stabilization of cyclic water tetramers and dimers in the crystal host of 2D coordination networks: electrical conductivity and dielectric studies
Source: Royal Society of Chemistry journal article supplement (doi:10.1039/d0nj03750h), 2020-01-01
Supplement: d0nj03750h1.pdf [file d0nj03750h1.pdf]

## **Stabilization of Cyclic Water Tetramer and Dimer in the Crystal Host of 2D Coordination Networks: Electrical Conductivity and Dielectric Studies**

Basudeb Dutta,<sup>a</sup> Sourav Ranjan Ghosh,<sup>b,c</sup> Apurba Ray,<sup>d</sup> Srikanta Jana,<sup>e</sup> Chittaranjan Sinha,<sup>e</sup>  
Sachindranath Das,\*<sup>d</sup> Atish Dipankar Jana,\*<sup>b</sup> and Mohammad Hedayetullah Mir\*<sup>a</sup>

<sup>a</sup>Department of Chemistry, Aliah University, New Town, Kolkata 700 156, India.

<sup>b</sup>Department of Physics, Behala College, Parnasree, Kolkata, 700 060, India.

<sup>c</sup>Department of Physics, Heritage Institute of Technology, Kolkata 700 107, India.

<sup>d</sup>Department of Instrumentation Science, Jadavpur University, Kolkata 700 032, India

<sup>e</sup>Department of Chemistry, Jadavpur University, Jadavpur, Kolkata 700 032, India.

To whom correspondence should be addressed. E-mails: [atishdipankarjana@yahoo.in](mailto:atishdipankarjana@yahoo.in) and  
[chmmir@gmail.com](mailto:chmmir@gmail.com)

### **Supporting Information**

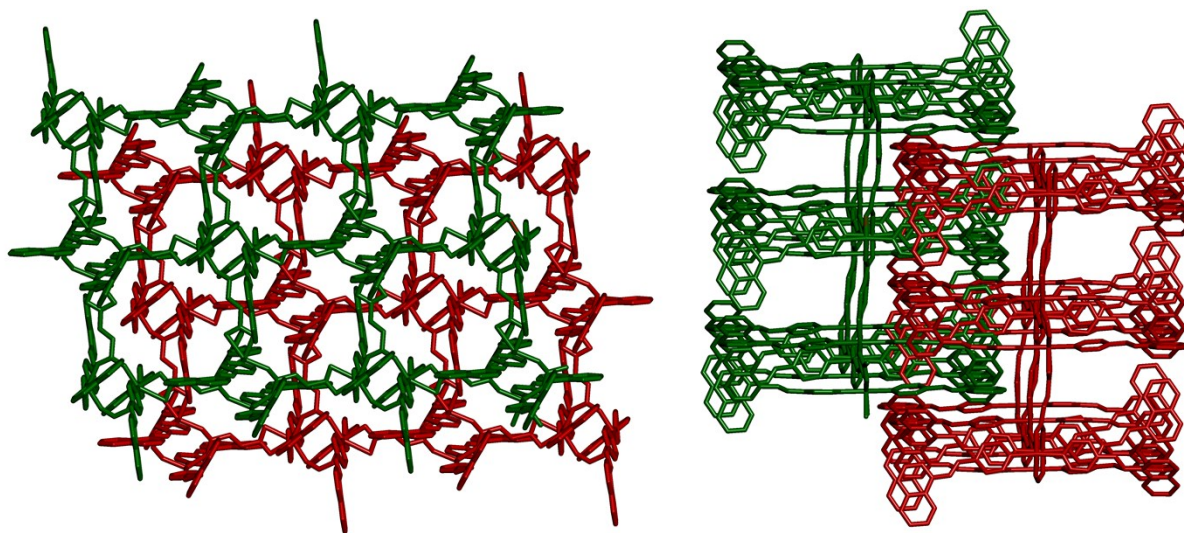

**Fig. S1** Side and top views of the 3D interdigitated network of **1**. The hydrogen atoms and solvent molecules are not shown for the clarity.

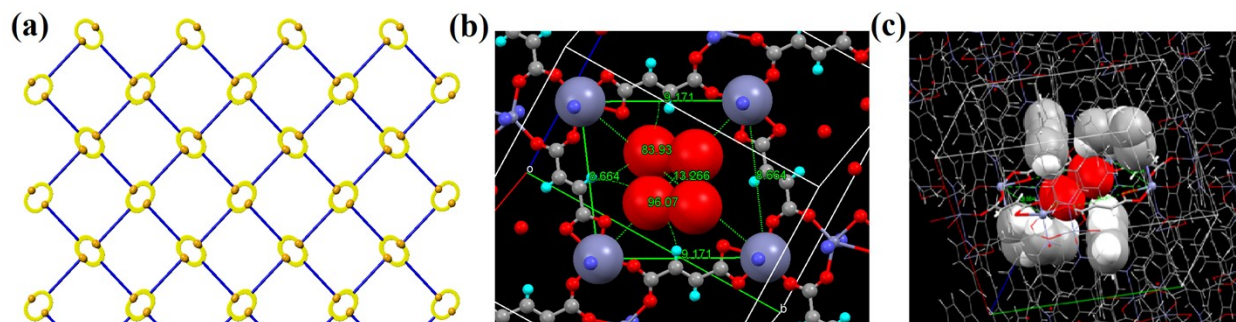

**Fig. S2** (a) The topology of the 2D layer of **1** (b) Water tetramer bound to the cage (c) The hydrophobic cavity provided by 4-pvp molecules (Tip of molecules are shown in CPK model).

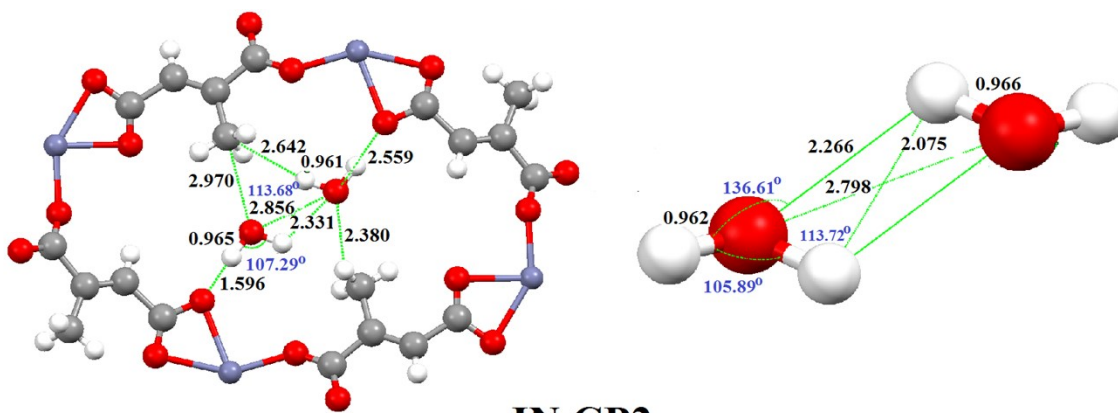

Fig. S3 The optimized geometry water dimer in the cavity of **2** and the corresponding optimized geometry of the free ring dimer.

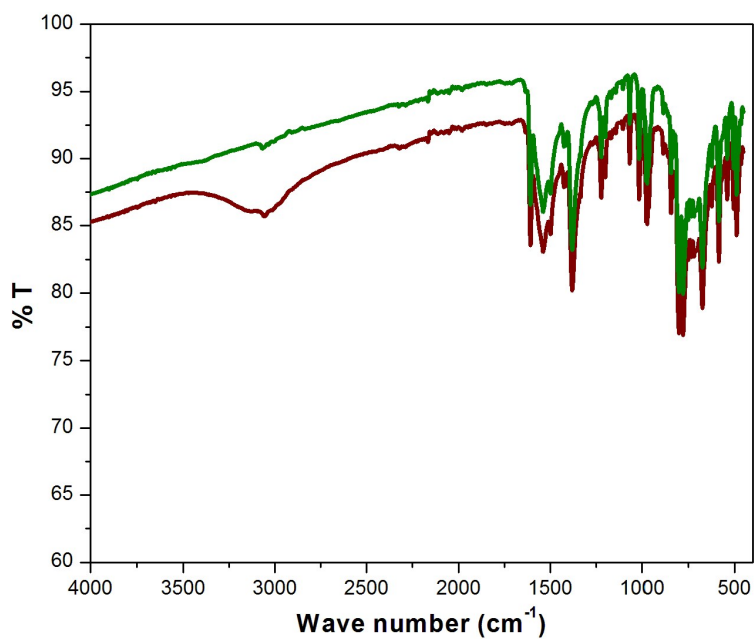

Fig. S4 IR Spectra of as-synthesized **1** (wine) and dehydrated **1** (olive).

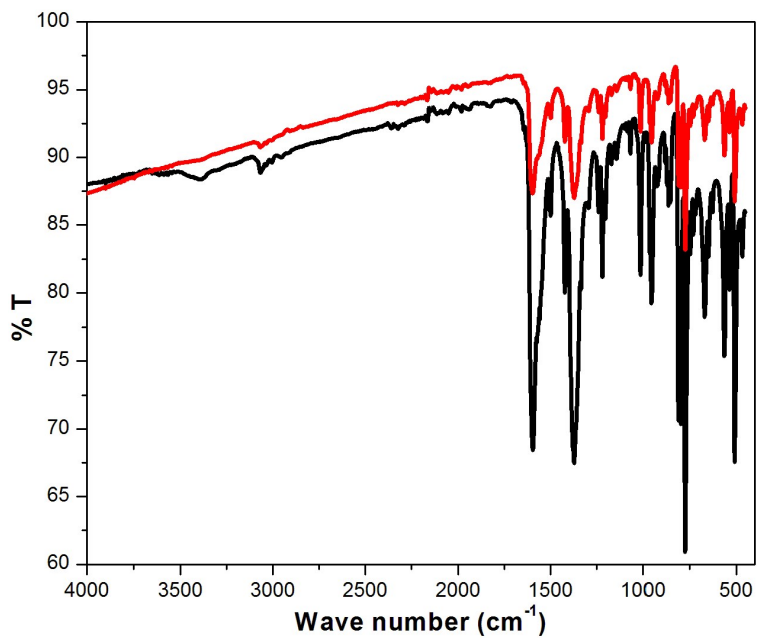

**Fig. S5** IR Spectra of as-synthesized **2** (black) and dehydrated **2** (red).

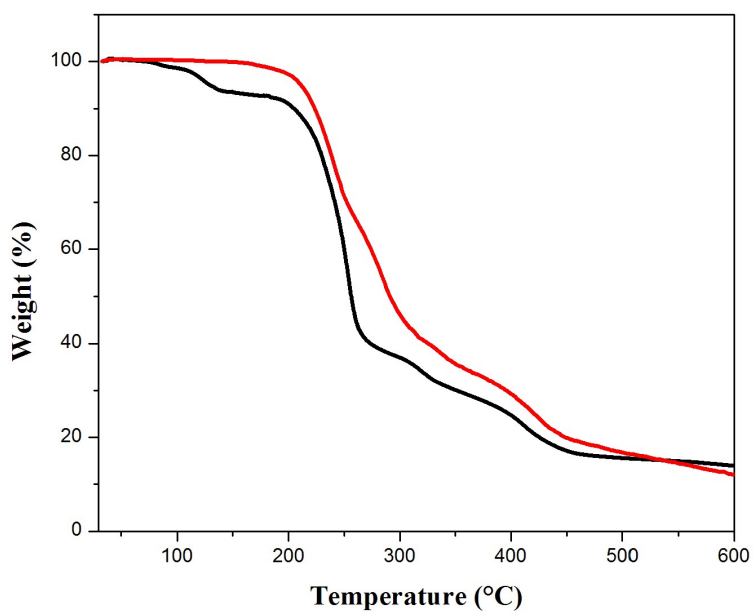

**Fig. S6** TGA plots of as-synthesized **1** (black) and dehydrated **1** (red).

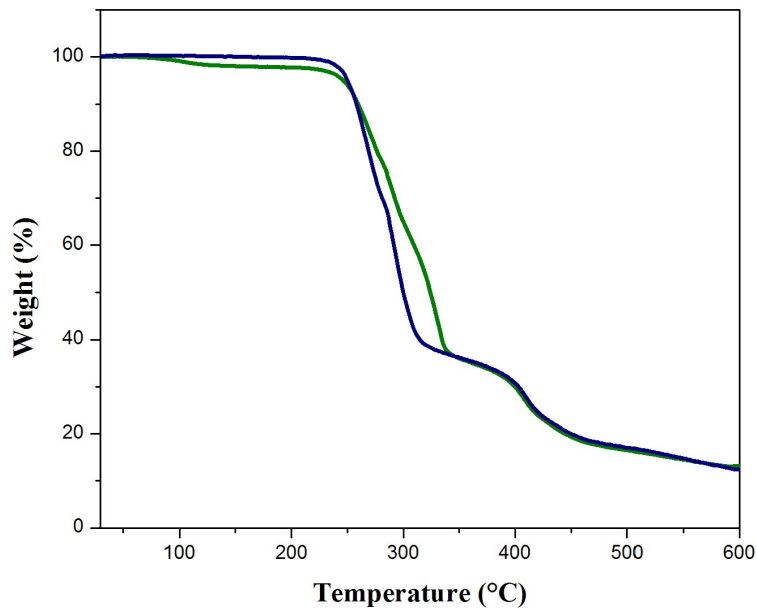

**Fig. S7** TGA plots of as-synthesized **2** (blue) and dehydrated **2** (green).

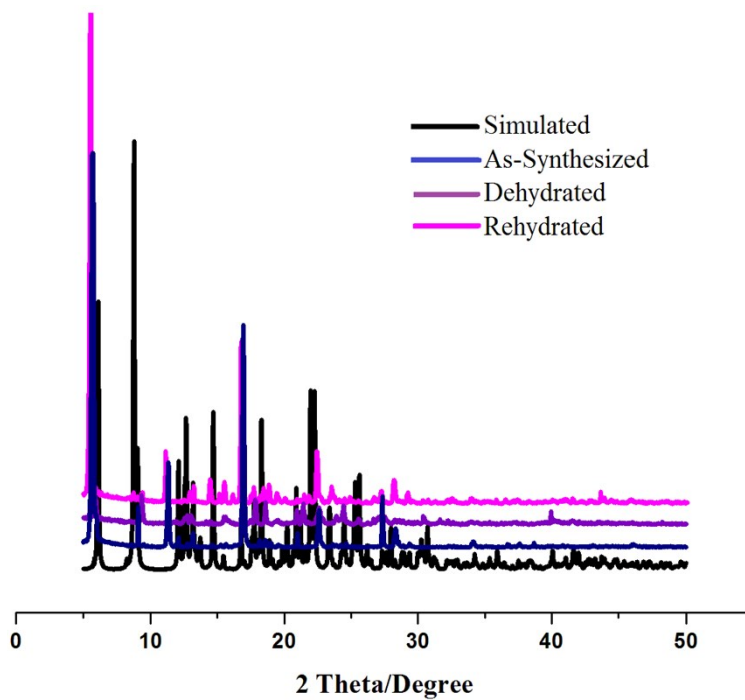

**Fig. S8** Powder X-ray diffraction patterns of simulated **1** (black), as-synthesized **1** (green), dehydrated **1** (pink), rehydrated **1** (blue).

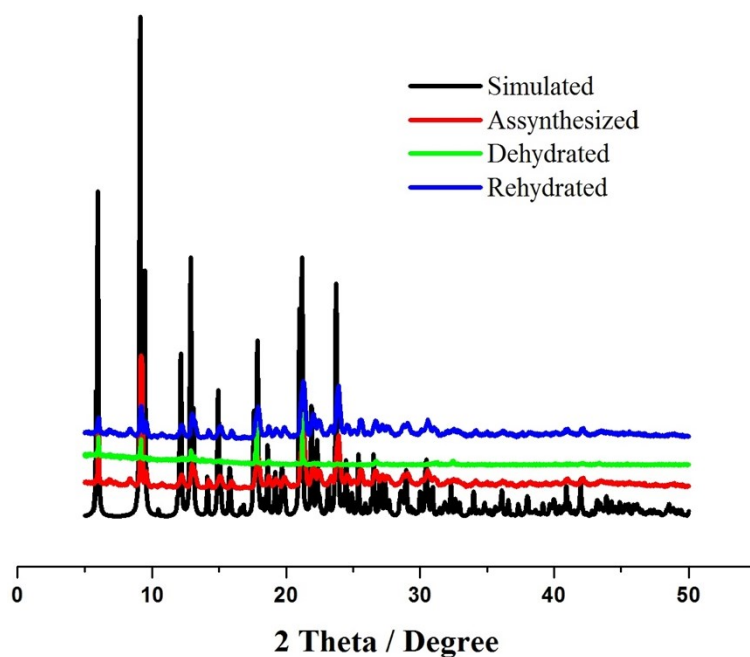

**Fig. S9** Powder X-ray diffraction patterns of simulated **1** (black), as-synthesized **1** (red), dehydrated **1** (green), rehydrated **1** (blue).

**Table S1.** Crystal data and refinement parameters for compound **1**

| Formula                                 | $C_{38}H_{32}N_2O_6Zn$ ( <b>1</b> ) | $C_{39}H_{32}N_2O_5Zn$ ( <b>2</b> ) |
|-----------------------------------------|-------------------------------------|-------------------------------------|
| fw                                      | 678.05                              | 673.44                              |
| crystalsyst                             | monoclinic                          | monoclinic                          |
| space group                             | $P2_1/c$                            | $P2_1/c$                            |
| $a$ (Å)                                 | 15.7865(16)                         | 15.7596(17)                         |
| $b$ (Å)                                 | 15.7979(16)                         | 16.9112(19)                         |
| $c$ (Å)                                 | 14.0932(15)                         | 12.5653(14)                         |
| $\alpha$ (deg)                          | 90                                  | 90                                  |
| $\beta$ (deg)                           | 113.559(3)                          | 109.196(3)                          |
| $\gamma$ (deg)                          | 90                                  | 90                                  |
| $V$ (Å <sup>3</sup> )                   | 3221.8(6)                           | 3162.6(6)                           |
| $Z$                                     | 4                                   | 4                                   |
| $D_{\text{calcd}}$ (g/cm <sup>3</sup> ) | 1.398                               | 1.389                               |
| $\mu$ (mm <sup>-1</sup> )               | 1.477                               | 0.823                               |

|                                                      |                                 |                                 |
|------------------------------------------------------|---------------------------------|---------------------------------|
| $\lambda(\text{\AA})$                                | 0.71073                         | 0.71073                         |
| data[ $I > 2\sigma(I)$ ]/params                      | 5248/436                        | 5555/428                        |
| GOF on $F^2$                                         | 1.063                           | 1.071                           |
| final $R$ indices[ $I > 2\sigma(I)$ ] <sup>a,b</sup> | $R1 = 0.0593$<br>$wR2 = 0.1322$ | $R1 = 0.0660$<br>$wR2 = 0.1672$ |

$${}^a R1 = \Sigma ||F_o| - |F_c|| / \Sigma |F_o|, {}^b wR2 = [\Sigma w(F_o^2 - F_c^2)^2 / \Sigma w(F_o^2)^2]^{1/2}$$

**Table S2.** Selected bond lengths and bond angles in **1**

|           |            |             |            |
|-----------|------------|-------------|------------|
| Zn1-O2    | 2.005(3)   | O3-Zn1-O4   | 58.56(10)  |
| Zn1-O1    | 2.006(3)   | N1-Zn1-O4   | 88.82(11)  |
| Zn-O3     | 2.103(3)   | N2-Zn1-O4   | 87.32(11)  |
| Zn1-N1    | 2.152(3)   | O2-Zn1-C40) | 118.86(12) |
| Zn1-N2    | 2.167(3)   | O1-Zn1-C40  | 116.80(12) |
| Zn1-O4    | 2.382(3)   | O3-Zn1-C40  | 29.42(12)  |
| O2-Zn1-O1 | 124.10(11) | N1-Zn1-C40  | 89.87(12)  |
| O2-Zn1-O3 | 89.46(11)  | O 2-Zn1-C40 | 88.90(12)  |
| O1-Zn1-O3 | 145.79(11) | O4-Zn1-C40  | 29.17(11)  |
| O2-Zn1-N1 | 91.19(12)  | C40-O3-Zn1  | 95.9(2)    |
| O1-Zn1-N1 | 84.02(12)  | C40-O4-Zn1  | 83.5(2)    |
| O3-Zn1-N1 | 89.30(11)  | C37-O2-Zn1  | 139.0(2)   |
| O2-Zn1-N2 | 94.42(12)  | C37-O1-Zn1  | 138.1(3)   |

|           |            |            |          |
|-----------|------------|------------|----------|
| O1-Zn1-N2 | 91.42(12)  | C24-N2-C20 | 117.2(3) |
| O3-Zn1-N2 | 92.44(11)  | C24-N2-Zn1 | 121.4(3) |
| N1-Zn1-N2 | 174.14(13) | C20-N2-Zn1 | 121.4(3) |
| O2-Zn1-O4 | 148.02(10) | C3-N1-C7   | 117.0(3) |
| O1-Zn1-O4 | 87.71(10)  | C3-N1-Zn1  | 124.9(3) |

Symmetry Code: a = 1-x, 1/2+y, 3/2-z; b = 1-x, -y, 1-z; c = x, 1/2-y, -1/2+z; d = x, 1/2-y, 1/2+z

**Table S3.** Selected bond lengths and bond angles in **2**

|                   |           |                    |            |
|-------------------|-----------|--------------------|------------|
| Zn01 - O1         | 2.024(3)  | O1 - Zn01 - O3_b   | 149.7(2)   |
| Zn01 - O4_b       | 2.302(7)  | N1 - Zn01 - N2     | 178.91(14) |
| Zn01 - N1         | 2.179(5)  | N1 - Zn01 - O2_c   | 86.69(14)  |
| Zn01 - O2_c       | 2.035(4)  | N2 - Zn01 - O2_c   | 94.21(14)  |
| Zn01 - N2         | 2.174(5)  | O4_b - Zn01 - O2_c | 146.27(17) |
| Zn01 - O3_b       | 2.225(7)  | C39- O3 - Zn01_a   | 92.1(5)    |
| O1 - Zn01 - N1    | 87.96(13) | Zn01 - N1 - C5     | 118.9(3)   |
| O1 - Zn01 - O4_b  | 93.10(17) | Zn01 - N1 - C1     | 125.3(3)   |
| N1 - Zn01 - O3_b  | 89.5(2)   | C35- O2 - Zn01_c   | 146.8(3)   |
| N2 - Zn01 - O3_b  | 91.2(2)   | C39- O4 - Zn01_a   | 86.4(6)    |
| O3_b- Zn01 - O4_b | 56.7(2)   | Zn01 - O1 - C35    | 130.7(3)   |
| O1 - Zn01 - N2    | 91.05(13) | O3_b-Zn01-O1-C35   | 145.4(5)   |



|                   |            |                  |          |
|-------------------|------------|------------------|----------|
| O1 - Zn01 - O2_c  | 120.31(14) | O4_b-Zn01-O1-C35 | 140.6(4) |
| N1- Zn01 - O4_b   | 90.3(2)    | N2-Zn01-O1-C35   | 51.2(4)  |
| N2- Zn01 - O4_b   | 89.3(2)    | O1-Zn01-N1-C5    | 174.8(4) |
| O3_b- Zn01 - O2_c | 89.6(2)    | O4_b-Zn01 -N1-C1 | 88.0(4)  |
| O2_c-Zn01-N2 -C18 | 147.6(4)   | O3_b-Zn01-N1-C1  | 144.8(4) |

Symmetry Code: a = 1-x, -1/2+y, 3/2-z; b = 1-x, 1/2+y, 3/2-z; c = 1-x, 1-y, 1-z; d = x, 1/2-y, -1/2+z

### **Binding Energy Calculations:**

#### **Binding Energy Calculations with BSSE for tetramer in 1:**

##### **a. Binding Energy of water in the crystal cavity**

Energy of Cavity + Water = - 9241.8351418 a.u.

Energy of water = - 305.8804259 a.u.

Energy of cavity = -8935.9330248 a.u.

Hence, Binding Energy = -0.0216911 a.u. = -13.6113626 kcal/mol

BSSE error = 02.4110827 kcal/mol

Corrected Binding Energy = -11.2002799 kcal/mol

##### **b. Binding Energy of water molecules in the water tetramer of the crystal cavity**

Energy of cavity water tetramer = -305.8804259 a.u.

Total energy of four individual water = (-76.4579984 -76.4581029 -76.4581013 -76.4579962) = -305.8321988

Hence, Binding energy = -0.0482271 a.u. = -30.2629393 kcal/mol

BSSE error = 03.2835336 kcal/mol

Corrected Binding Energy = -26.9794057 kcal/mol

### **c. Binding Energy of water molecules in the optimized water tetramer**

Energy of cavity water tetramer = -305.8815081 a.u.

Total energy of four individual water = (-76.4580699 - 76.4580582 -76.4580699 - 76.4580582) a.u. = -305.8322562 a.u.

Hence, Binding Energy = -0.0492519 a.u. = -30.92551919469 kcal/mol

BSSE error = 03.4375898 kcal/mol

Corrected Binding Energy = -27.4879294 kcal/mol

## **Binding Energy Calculations with BSSE error for ring dimer in 2:**

### **a. Binding Energy of water in the crystal cavity**

Energy of Cavity + Water = -9246.0228706 a.u.

Energy of water = -152.9239036 a.u.

Energy of cavity = -9093.0950119 a.u.

Hence, Binding Energy = 0.0039551 a.u. = -2.481861241 kcal/mol

BSSE error = 1.944350087 kcal/mol

Corrected Binding Energy = -0.53751115441 kcal/mol

### **b. Binding Energy of water molecules in the water dimer of the crystal cavity**

Energy of cavity water dimer = -152.9239036 a.u.

Total energy of two individual water = (-76.458402 + -76.458402) a.u. = -152.916804 a.u.

Hence, Binding Energy = -0.0070996 a.u. = - 4.455063606 kcal/mol

BSSE error = 0.333904819 kcal/mol

Corrected Binding Energy = - 4.1211588 kcal/mol

### c. Binding Energy of water molecules in the optimized water dimer

Energy of optimized water dimer = - 152.9242714 a.u.

Total energy of two individual water = ( -76.4585002 + -76.4585002) a.u. = -152.9170004 a.u.

Hence, Binding energy= -0.007271 a.u. = -4.562618666 kcal/mol

BSSE error = 0.40031809 kcal/mol

Corrected Binding Energy = -4.162300576 kcal/mol

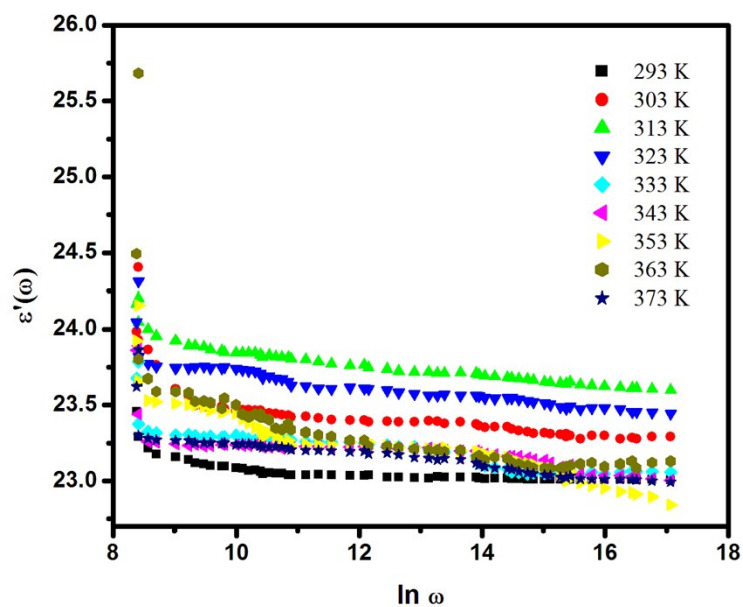

**Fig. S10**  $\epsilon'(\omega)$  vs  $\log\omega$  plot of **1** at various temperatures.

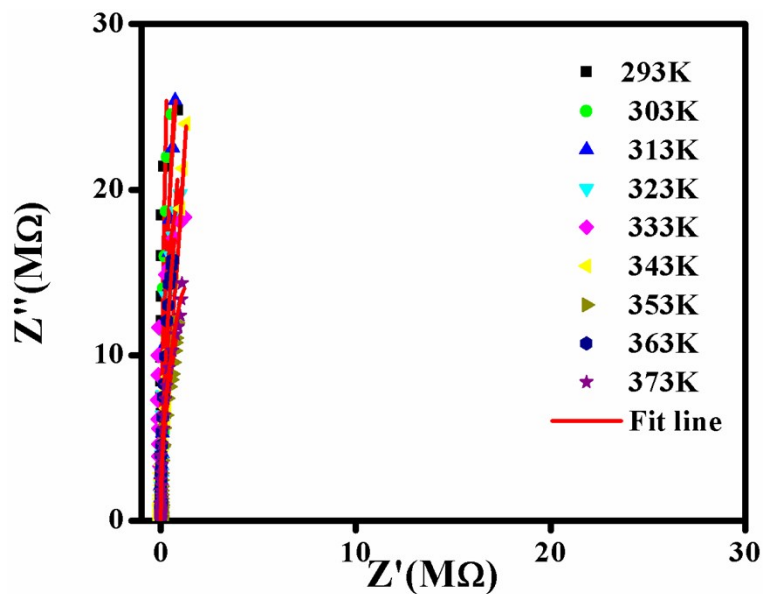

Fig. S11 Cole-Cole plots of **2** at various temperatures.

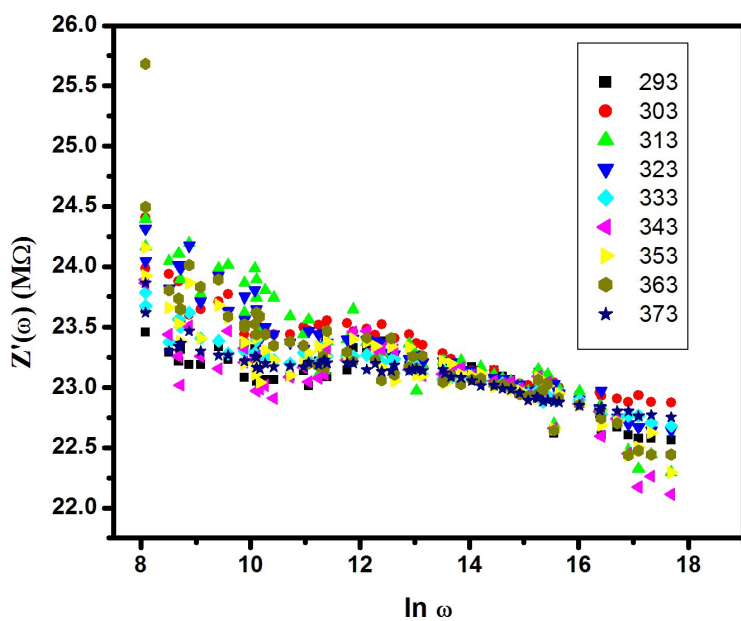

Fig. S12  $Z'(\omega)$  vs  $\log \omega$  plot of **2**.

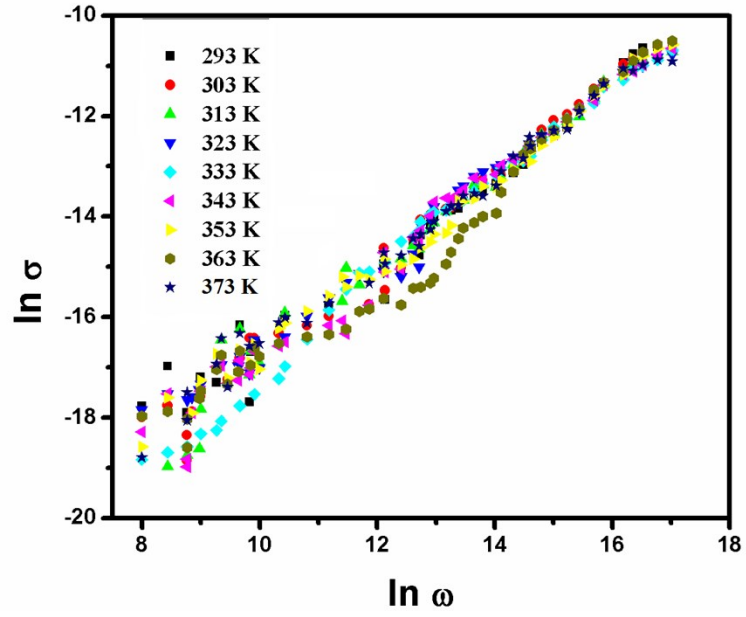

**Fig. S13** Frequency dependent ac conductivity ( $\ln\sigma_{ac}$ ) plot of **2** at various temperatures.

**Table S4.** The variation of resistance and capacitance values of **1** at various temperatures.

| Temperature(K) | $R_g$ (M $\Omega$ ) | $C_g$ (pF) | $R_{gb}$ (M $\Omega$ ) | $C_g$ (pF) | Fitting goodness factor $\chi^2$ |
|----------------|---------------------|------------|------------------------|------------|----------------------------------|
| 293            | 2593                | 12.53      | 0.455                  | 0.6647     | 0.0178                           |
| 303            | 841.2               | 12.54      | 217.2                  | 14.4       | 0.0788                           |
| 313            | 642.4               | 12.5       | 640.2                  | 17.19      | 0.221                            |
| 323            | 386                 | 13.91      | 2.124                  | 0.158      | 0.194                            |
| 333            | 36.18               | 20.51      | 15.53                  | 31.82      | 0.267                            |
| 343            | 1.248               | 150.3      | 1458                   | 13.66      | 0.2663                           |
| 353            | 11.25               | 23.22      | 11.52                  | 26.73      | 0.289                            |
| 363            | 18.22               | 25.94      | 17.86                  | 23.91      | 0.254                            |
| 373            | 14.74               | 22.83      | 13.51                  | 27.37      | 0.235                            |

**Table S5.** The variation of resistance and capacitance values of **2** at various temperatures.

| Temperature (K) | $R_g$ (M $\Omega$ ) | $C_g$ (pF) | $R_{gb}$ (M $\Omega$ ) | $C_g$ (pF) | Fitting goodness factor $\chi^2$ |
|-----------------|---------------------|------------|------------------------|------------|----------------------------------|
| 293             | 63.35               | 19.25      | 1.148                  | 77.51      | 0.05888                          |
| 303             | 32.95               | 20.93      | 1.054                  | 60.87      | 0.05582                          |
| 313             | 39.3                | 19.78      | 0.825                  | 71.04      | 0.05729                          |
| 323             | 76.85               | 19.22      | 1.475                  | 76.85      | 0.06285                          |
| 333             | 0.838               | 97.01      | 81.44                  | 17.95      | 0.06283                          |
| 343             | 0.129               | 15.83      | 0.053                  | 283        | 0.02668                          |
| 353             | 81.53               | 18.52      | 0.581                  | 124.4      | 0.09980                          |
| 363             | 51.42               | 19.87      | 1.0                    | 81.49      | 0.07000                          |
| 373             | 1.401               | 42.28      | 11.55                  | 28.58      | 0.07010                          |
